# Supplementary material for: Novel Thiazolidinedione and Rhodanine Derivatives Regulate Glucose Metabolism, Improve Insulin Sensitivity, and Activate the Peroxisome Proliferator-Activated γ Receptor
Source: PubMed Central journal article supplement — ACS Omega. 2024 Jan 25;9(5):5463–84. doi: 10.1021/acsomega.3c07149 (PMC10851269; doi:10.1021/acsomega.3c07149), 2024-01-25
Supplement: ao3c07149_si_001.pdf [file ao3c07149_si_001.pdf]

# **Novel Thiazolidinedione and Rhodanine Derivatives Regulate Glucose Metabolism, Improve Insulin Sensitivity, and Activate Peroxisome Proliferator Activated Gamma Receptor.**

Shaikha S. Al Neyadi<sup>a</sup>, Abdu Adem<sup>b</sup>, Naheed Amir<sup>b</sup>, Mohammad A. Ghattas<sup>c</sup>, Ibrahim M. Abdou<sup>a\*</sup>, and Alaa A. Salem<sup>a\*</sup>

<sup>a</sup> Department of Chemistry, College of Science, United Arab Emirates University Al-Ain, United Arab Emirates.

<sup>b</sup> Department of Pharmacology and Therapeutics, College of Medicine and Health Sciences, United Arab Emirates University, Al-Ain, United Arab Emirates.

<sup>c</sup> College of Pharmacy, Al Ain University, Abu Dhabi, United Arab Emirates.

## **Materials supplied as supporting information.**

**Figures S1-S16:** IR and NMR spectra of synthesized TZDs and RDs. IR spectra (a), <sup>1</sup>H-NMR spectra (b), <sup>13</sup>C-NMR spectra (c).

**Table S1:** Docking scores of TZDs and RDs into PPAR- $\gamma$  crystal structures; PDB:1WM0, PDB:1ZGY and PDB:1I7L.

## **Captions of figures and tables**

Fig S1. (a) IR spectrum; (b) <sup>1</sup>H-NMR spectrum; (c) <sup>13</sup>C-NMR spectrum for compound 7a

Fig S2 (a) IR spectrum; (b) <sup>1</sup>H-NMR spectrum; (c) <sup>13</sup>C-NMR spectrum for compound 7b

Fig S3. (a) IR spectrum; (b) <sup>1</sup>H-NMR spectrum; (c) <sup>13</sup>C-NMR spectrum for compound 7c

Fig S4. (a) IR spectrum; (b) <sup>1</sup>H-NMR spectrum; (c) <sup>13</sup>C-NMR spectrum for compound 7d

Fig S5. (a) IR spectrum; (b) <sup>1</sup>H-NMR spectrum; (c) <sup>13</sup>C-NMR spectrum for compound 14

Fig S6. (a) IR spectrum; (b) <sup>1</sup>H-NMR spectrum; (c) <sup>13</sup>C-NMR spectrum for compound 19

Fig S7. (a) IR spectrum; (b) <sup>1</sup>H-NMR spectrum; (c) <sup>13</sup>C-NMR spectrum for compound 21

Fig S8. (a) IR spectrum; (b) <sup>1</sup>H-NMR spectrum; (c) <sup>13</sup>C-NMR spectrum for compound 23

Fig S9. (a) IR spectrum; (b) <sup>1</sup>H-NMR spectrum; (c) <sup>13</sup>C-NMR spectrum for compound 29

Fig S10. (a) IR spectrum; (b) <sup>1</sup>H-NMR spectrum; (c) <sup>13</sup>C-NMR spectrum for compound 33a

Fig S11. (a) IR spectrum; (b) <sup>1</sup>H-NMR spectrum; (c) <sup>13</sup>C-NMR spectrum for compound 33b

Fig S12. (a) IR spectrum; (b) <sup>1</sup>H-NMR spectrum; (c) <sup>13</sup>C-NMR spectrum for compound 33c

Fig S13. (a) IR spectrum; (b) <sup>1</sup>H-NMR spectrum; (c) <sup>13</sup>C-NMR spectrum for compound 33d

Fig S14. (a) IR spectrum; (b)  $^1\text{H}$ -NMR spectrum; (c)  $^{13}\text{C}$ -NMR spectrum for compound 33e

Fig S15. (a) IR spectrum; (b)  $^1\text{H}$ -NMR spectrum; (c)  $^{13}\text{C}$ -NMR spectrum for compound 33f

Fig S16. (a) IR spectrum; (b)  $^1\text{H}$ -NMR spectrum; (c)  $^{13}\text{C}$ -NMR spectrum for compound 33g

Table S1. Table S1. Docking scores of different ligands into PDB:1WM0, PDB:1ZGY and PDB:1I7I PPAR- $\gamma$  crystal structures.

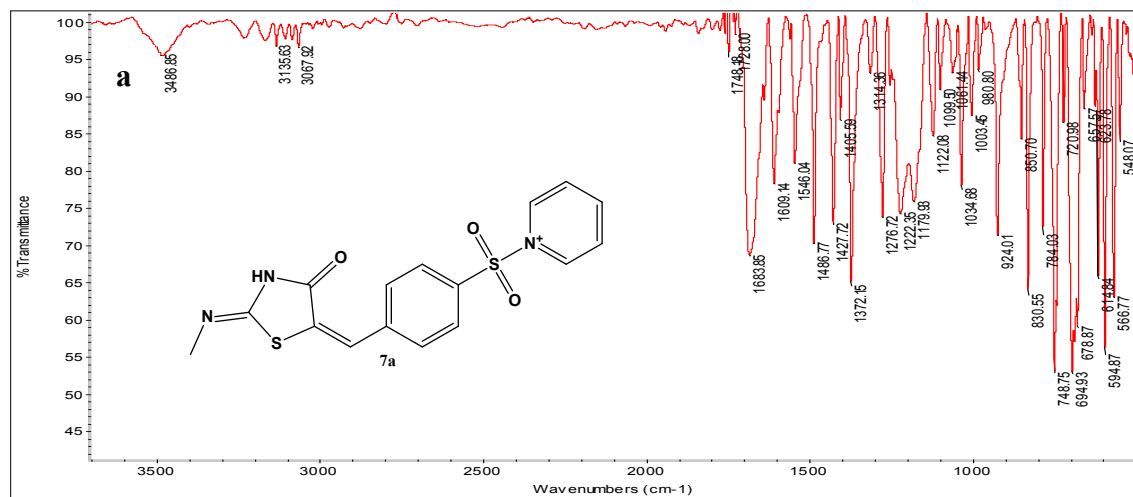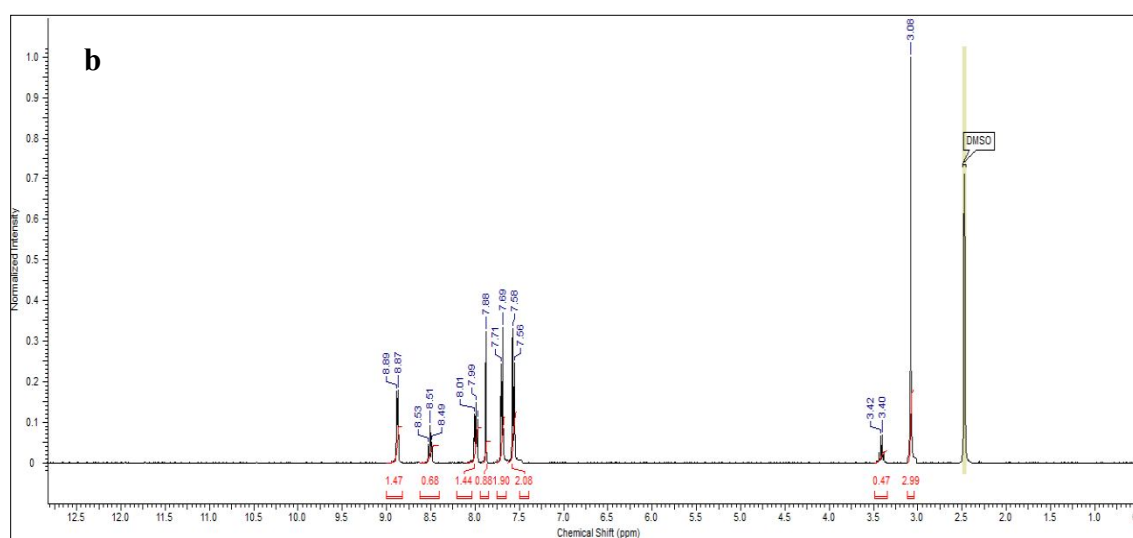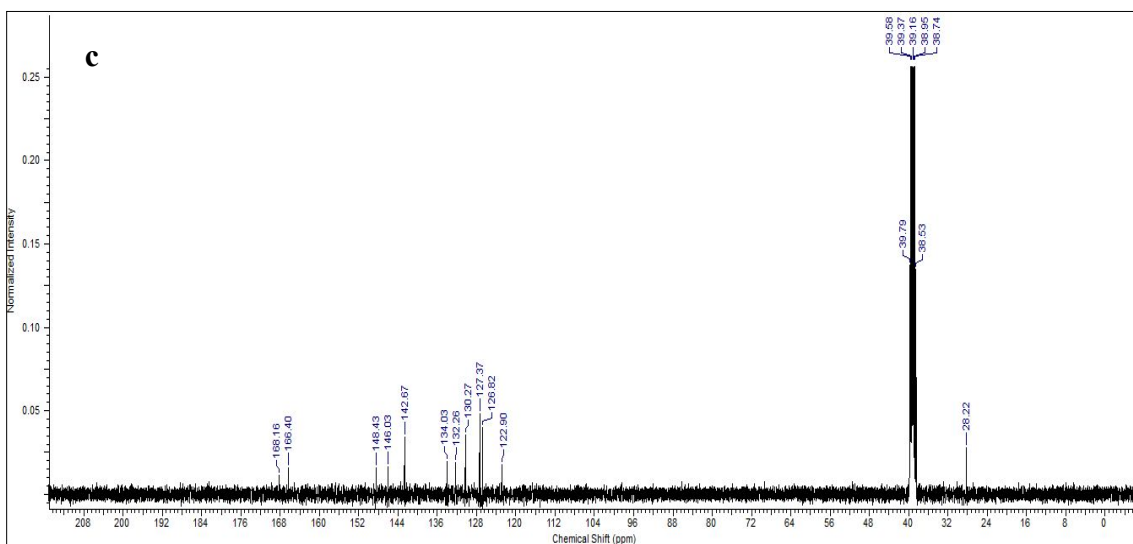

**Fig S1.** (a) IR spectrum; (b) <sup>1</sup>H-NMR spectrum; (c) <sup>13</sup>C-NMR spectrum for compound **7a**

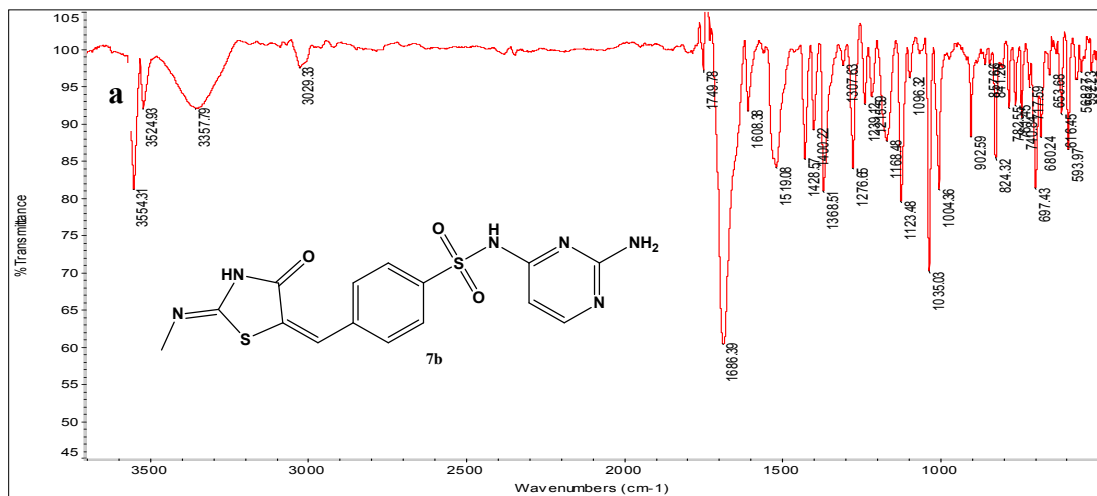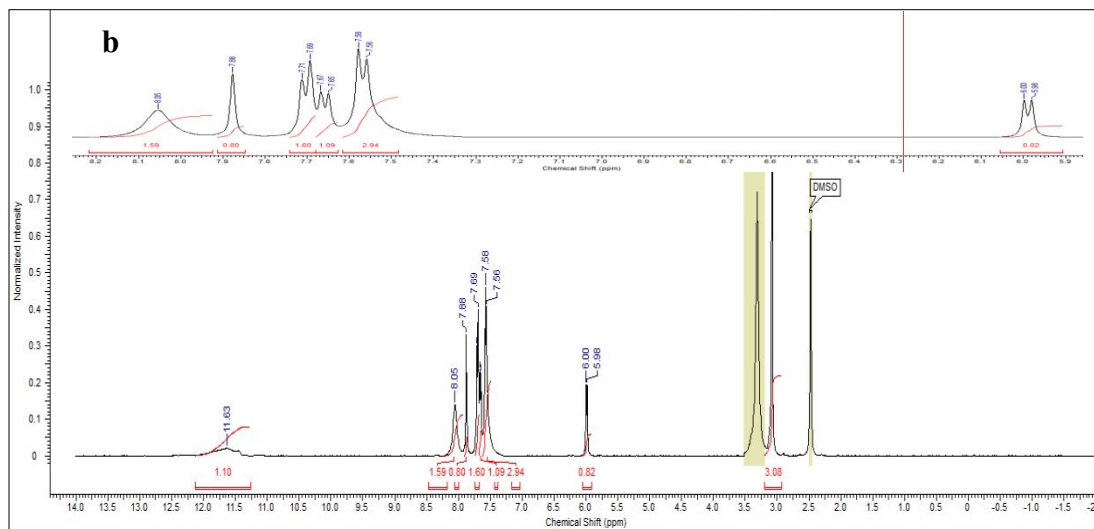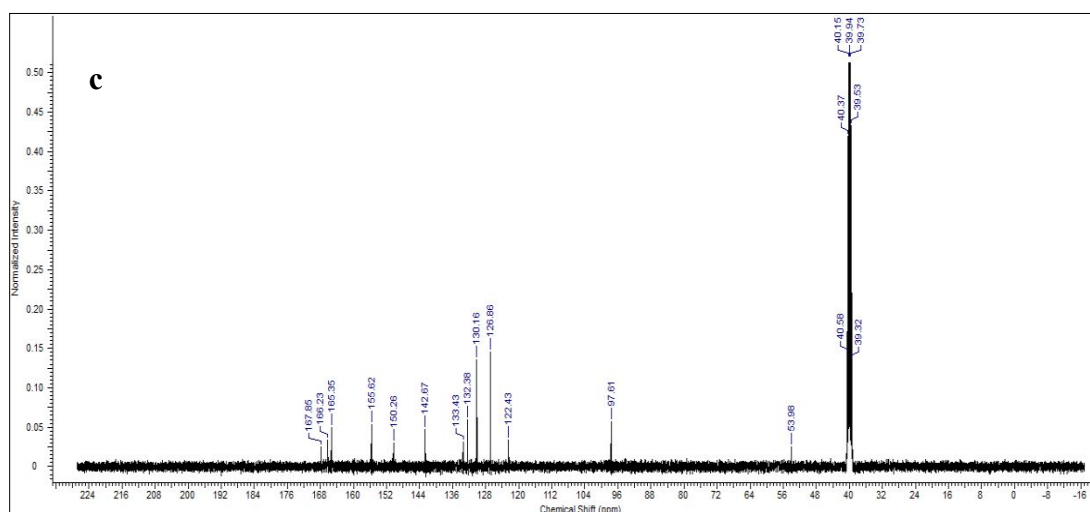

**Fig S2.** (a) IR spectrum; (b) <sup>1</sup>H-NMR spectrum; (c) <sup>13</sup>C-NMR spectrum for compound **7b**

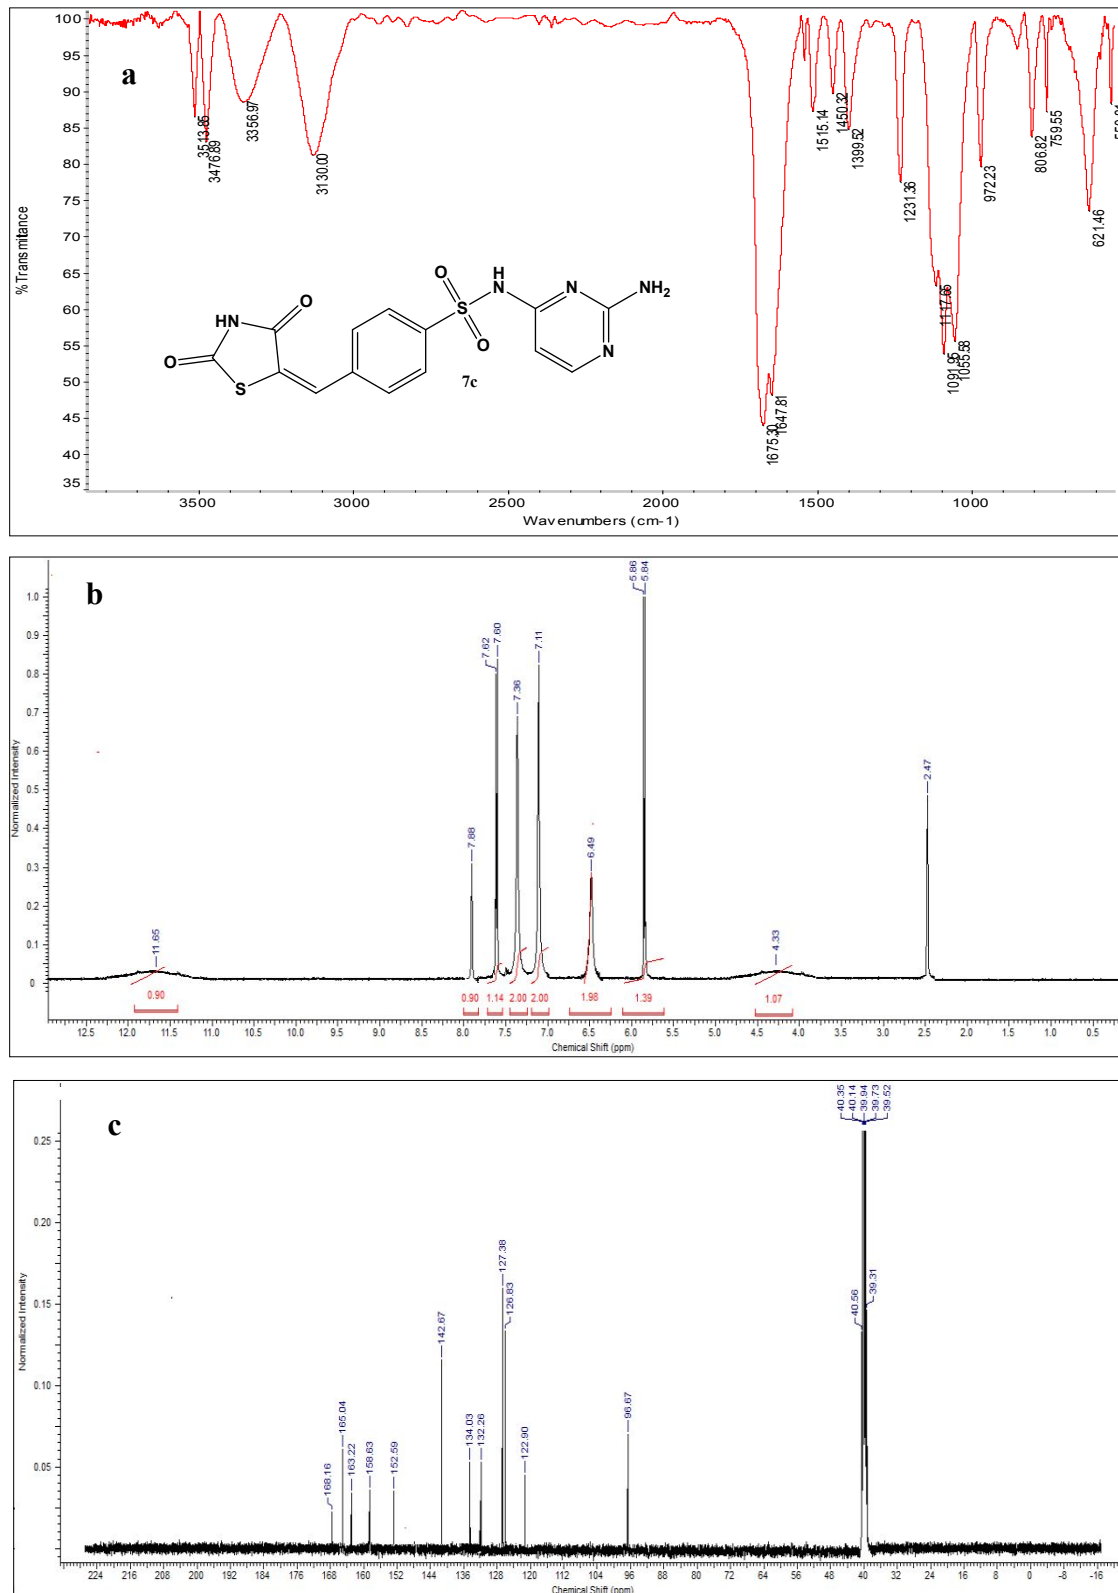

**Fig S3.** (a) IR spectrum; (b) <sup>1</sup>H-NMR spectrum; (c) <sup>13</sup>C-NMR spectrum for compound **7c**

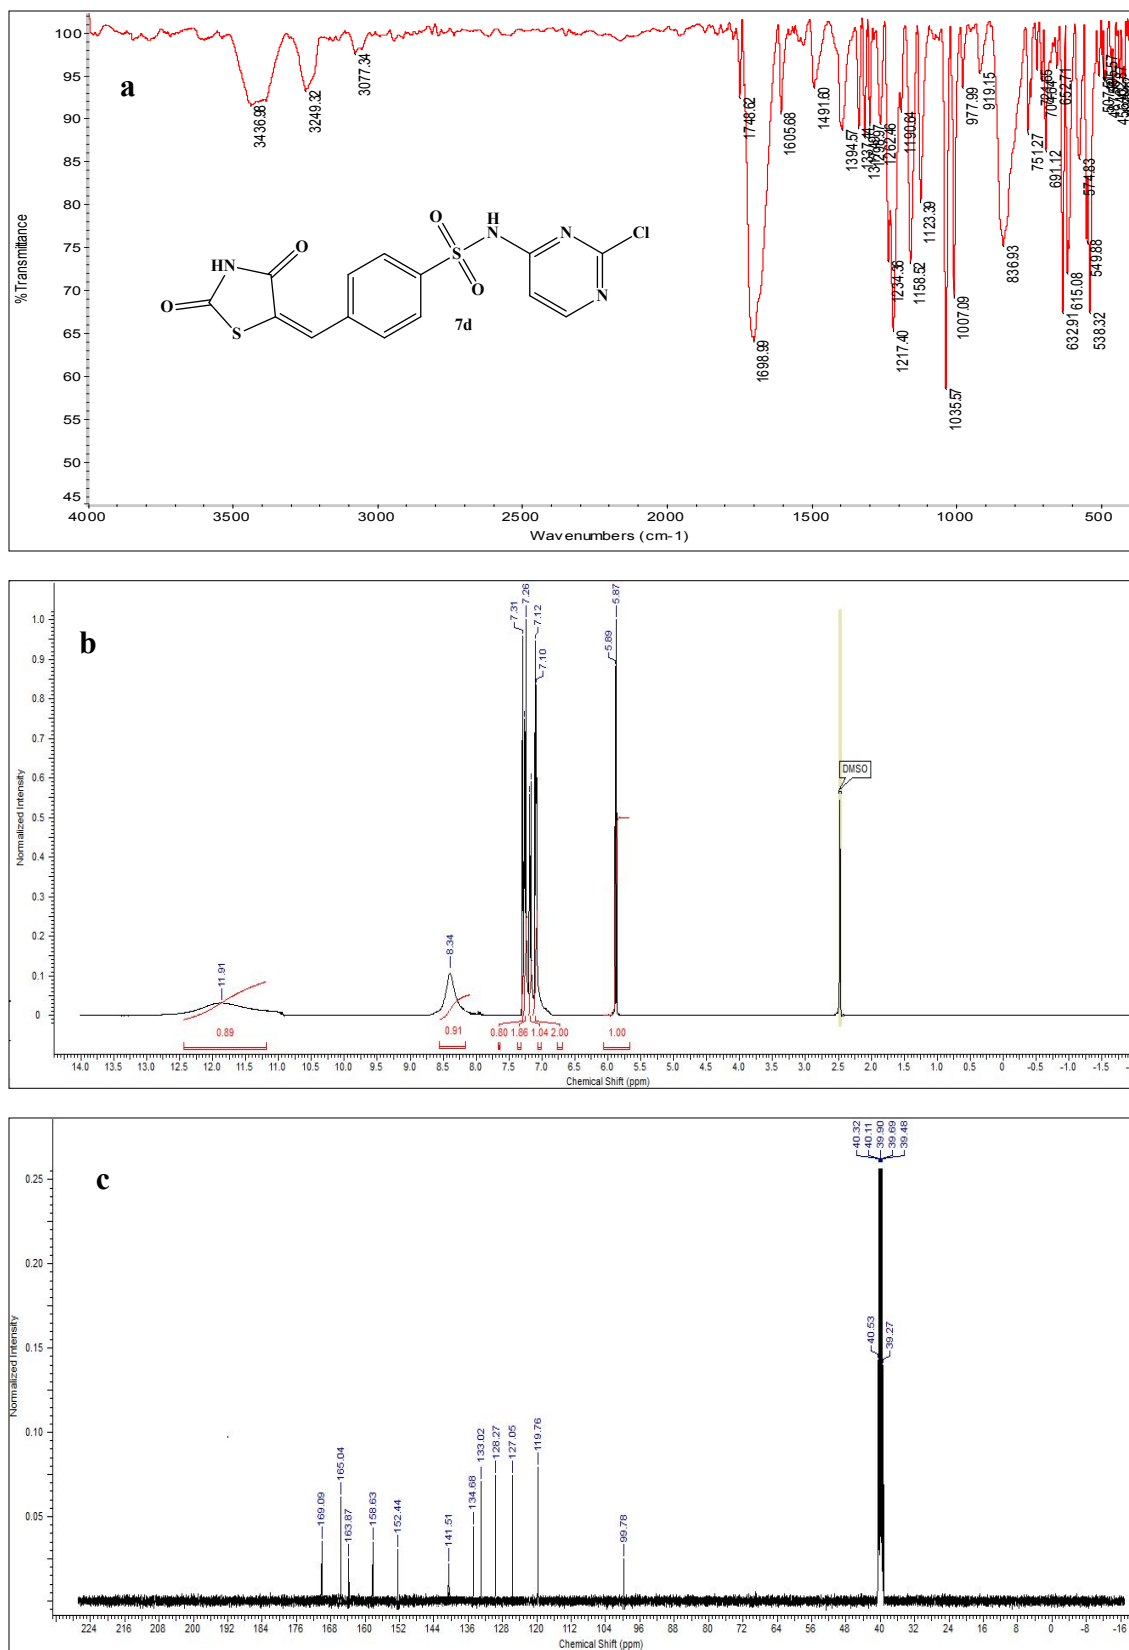

**Fig S4.** (a) IR spectrum; (b)  $^1\text{H}$ -NMR spectrum; (c)  $^{13}\text{C}$ -NMR spectrum for compound **7d**

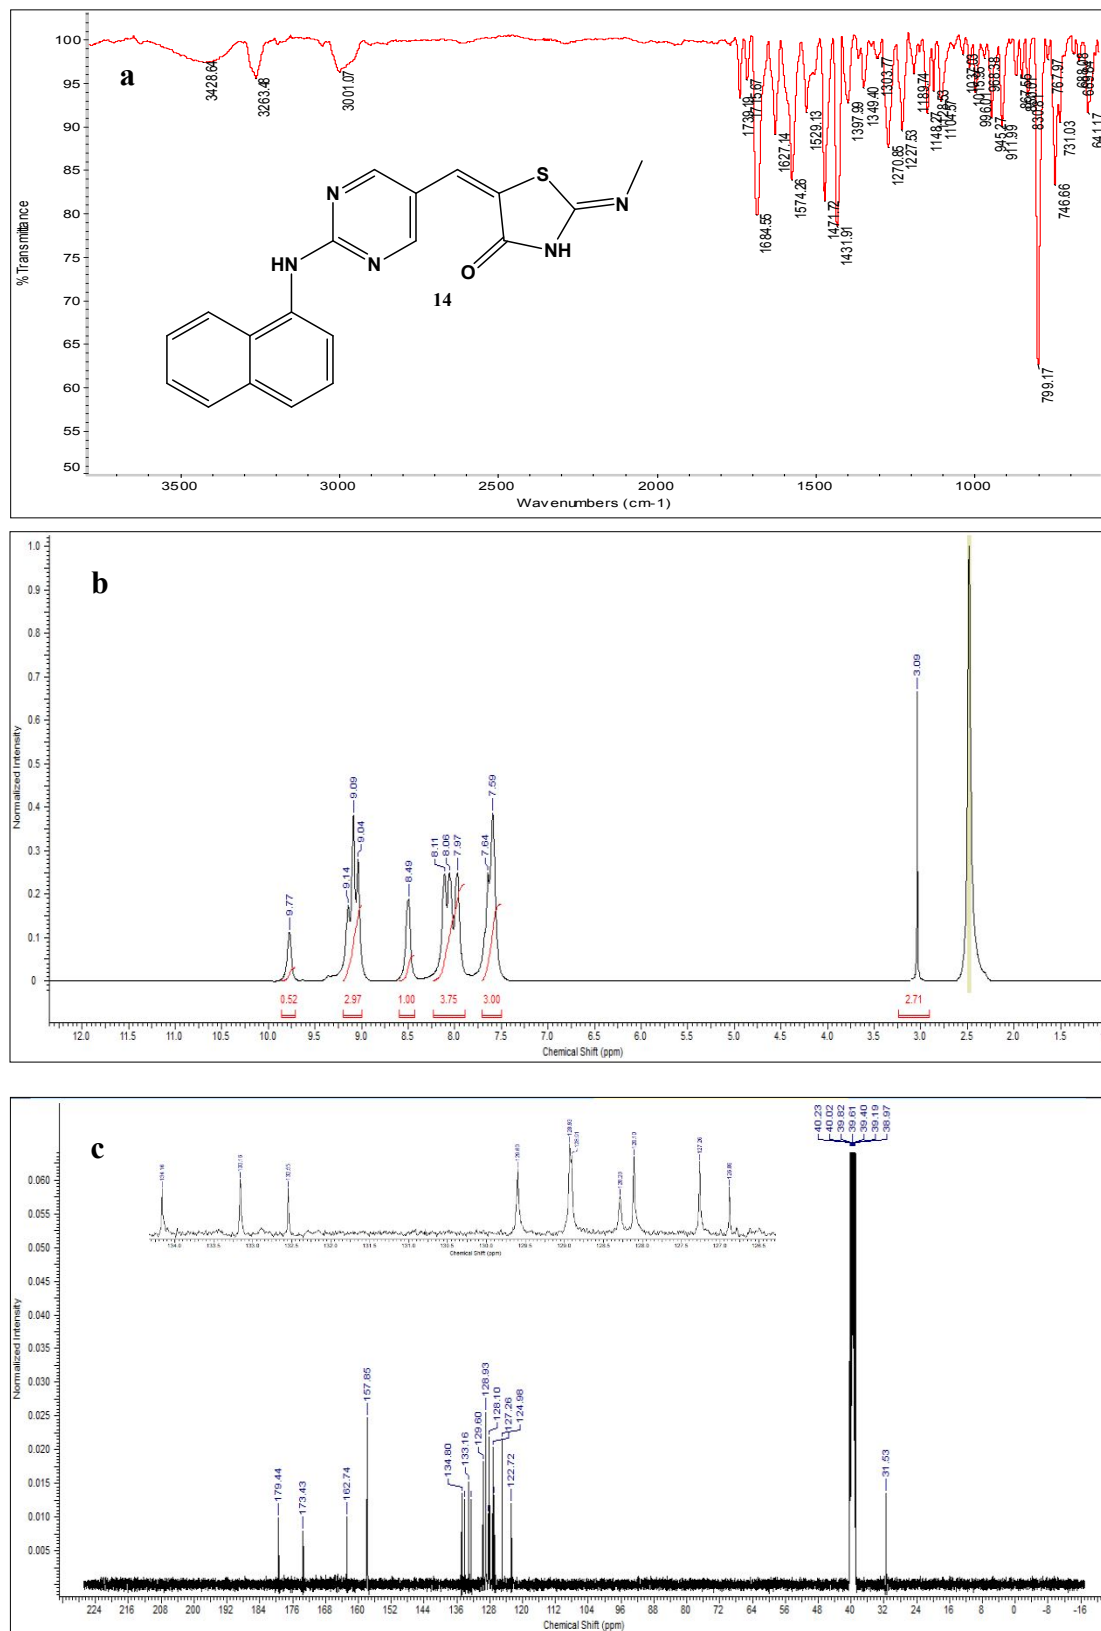

**Fig S5.** (a) IR spectrum; (b)  $^1\text{H}$ -NMR spectrum; (c)  $^{13}\text{C}$ -NMR spectrum for compound **14**

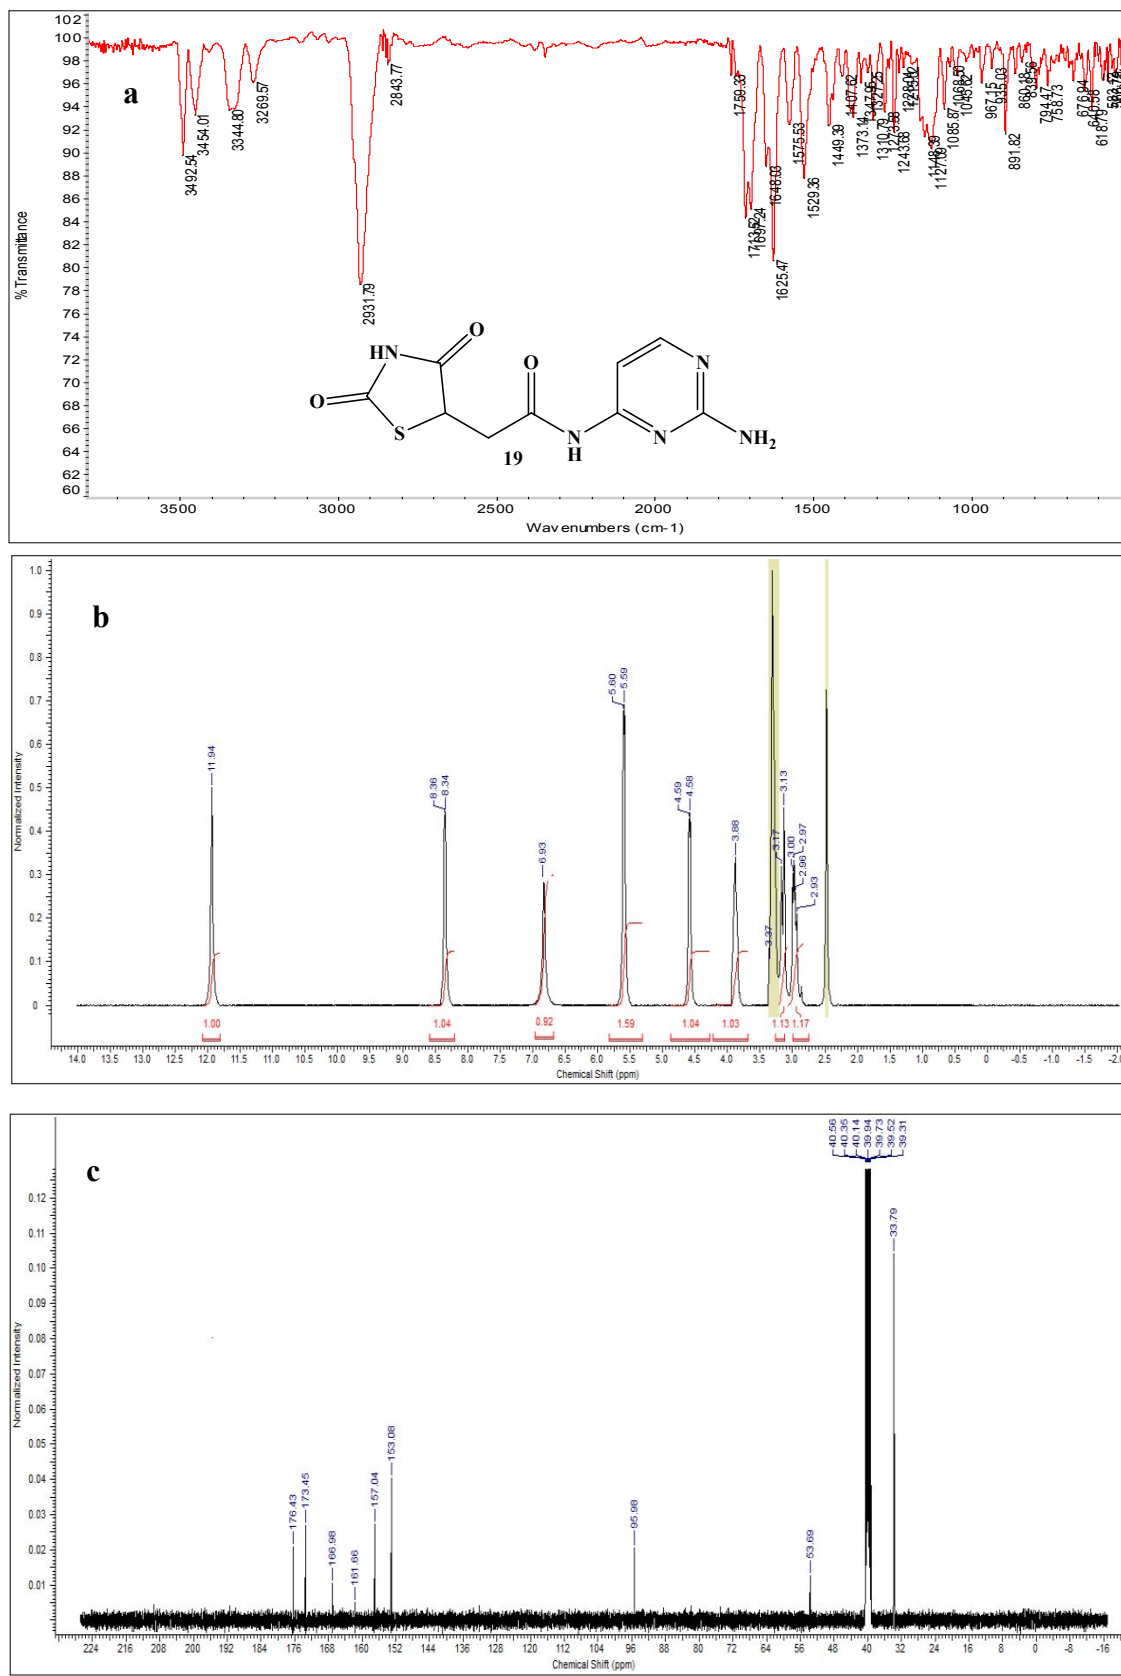

**Fig S6.** (a) IR spectrum; (b)  $^1\text{H}$ -NMR spectrum; (c)  $^{13}\text{C}$ -NMR spectrum for compound **19**



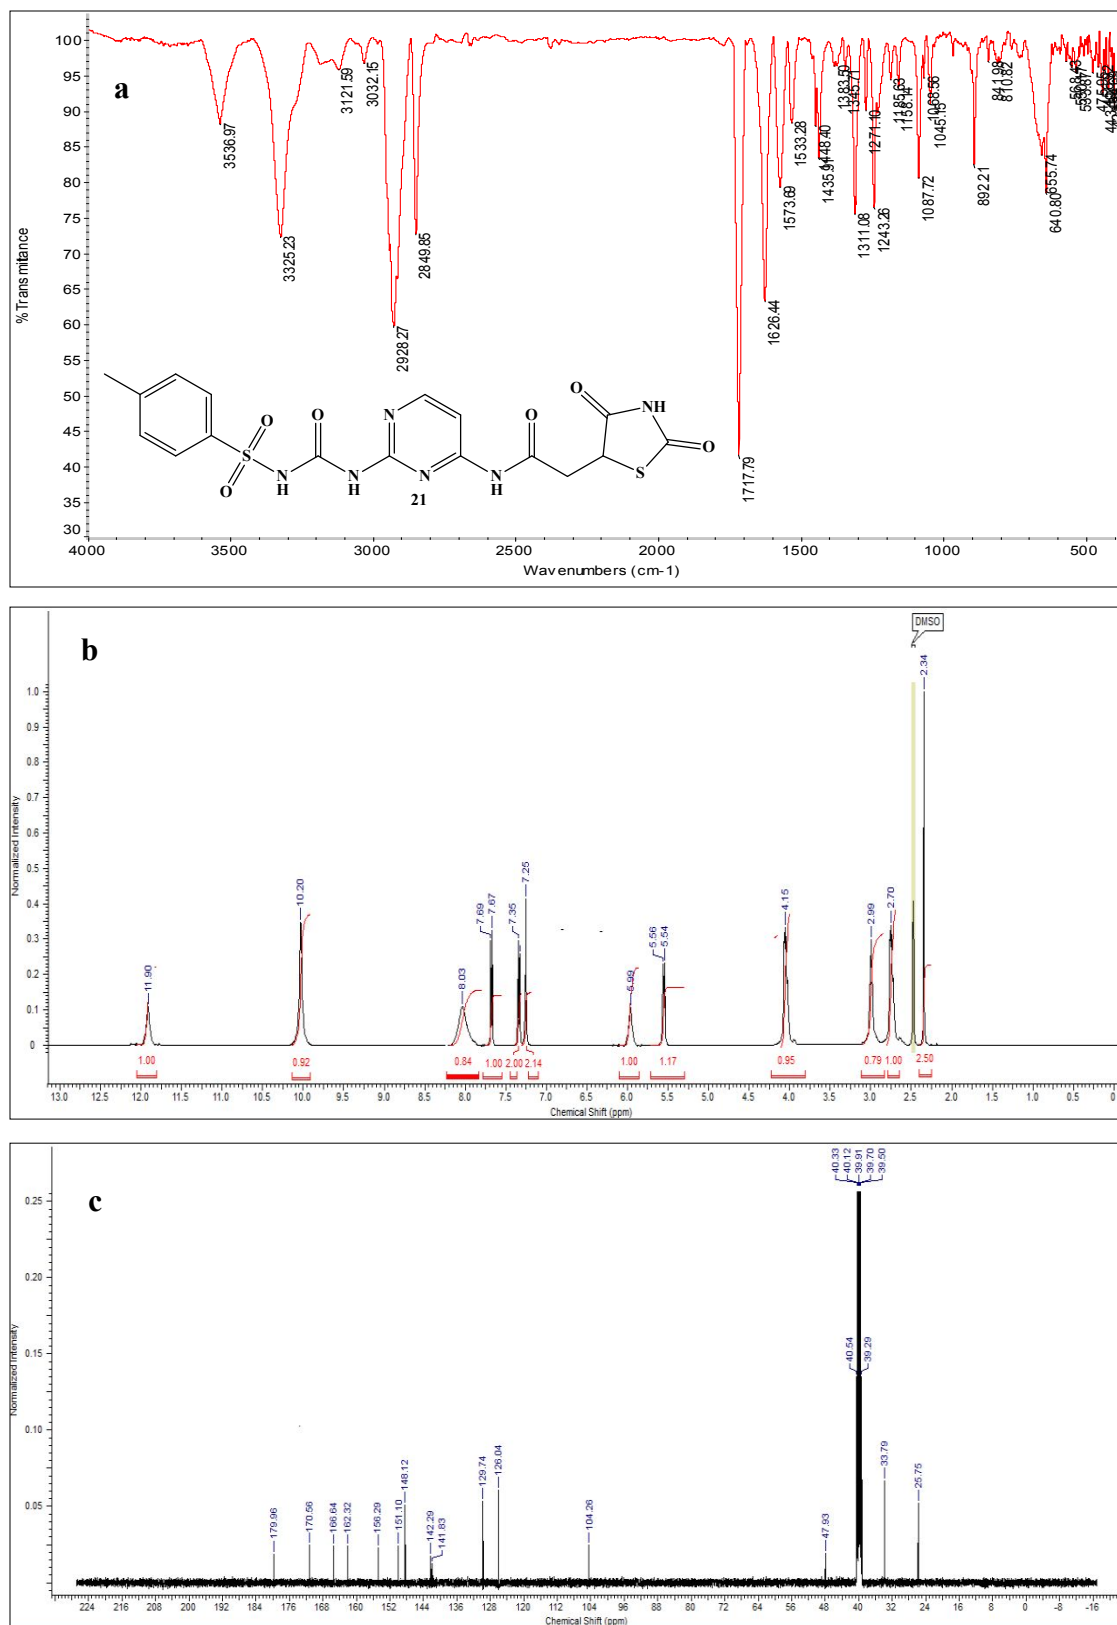

**Fig S7.** (a) IR spectrum; (b)  $^1\text{H}$ -NMR spectrum; (c)  $^{13}\text{C}$ -NMR spectrum for compound **21**

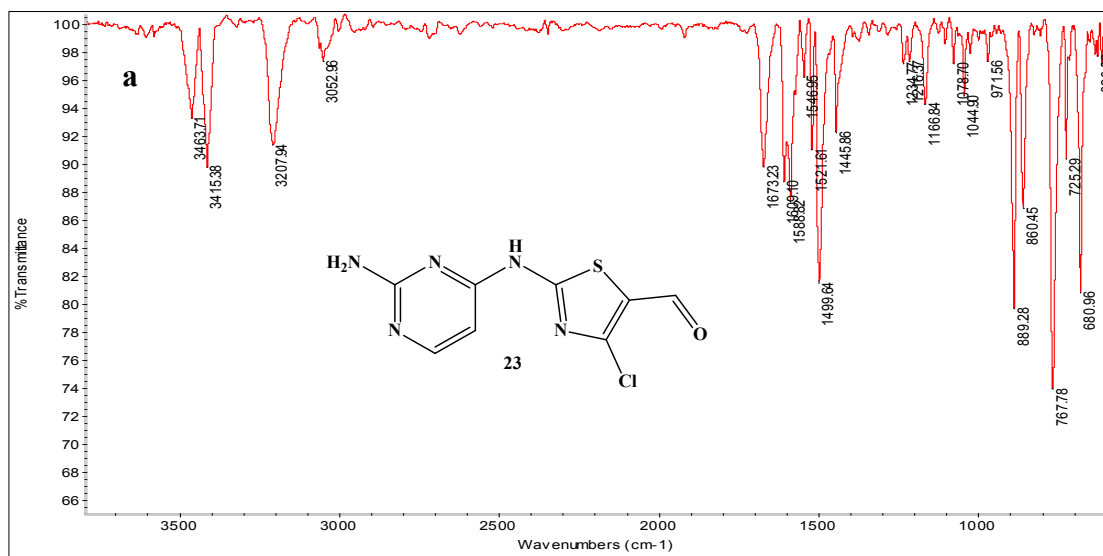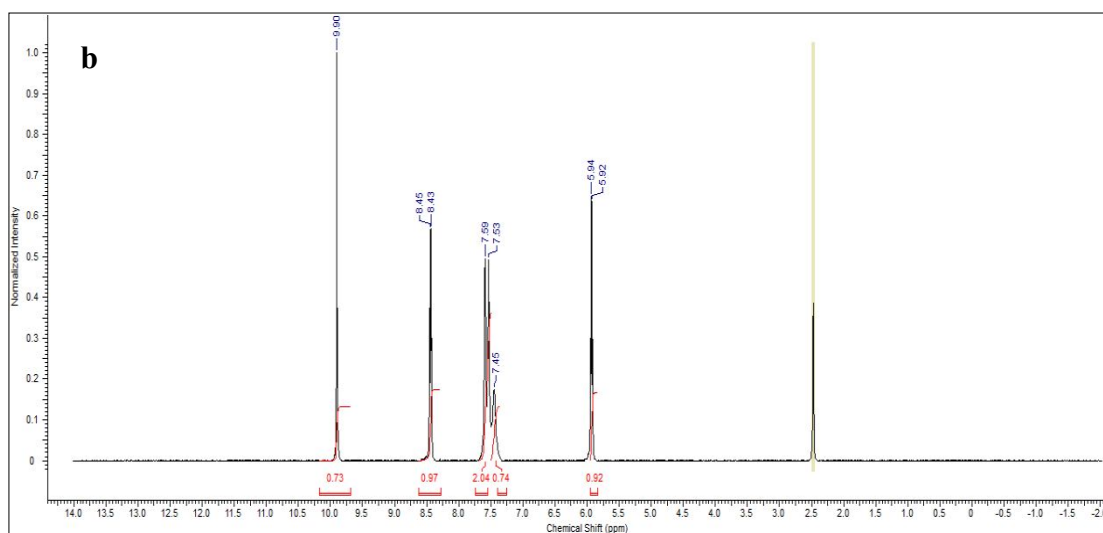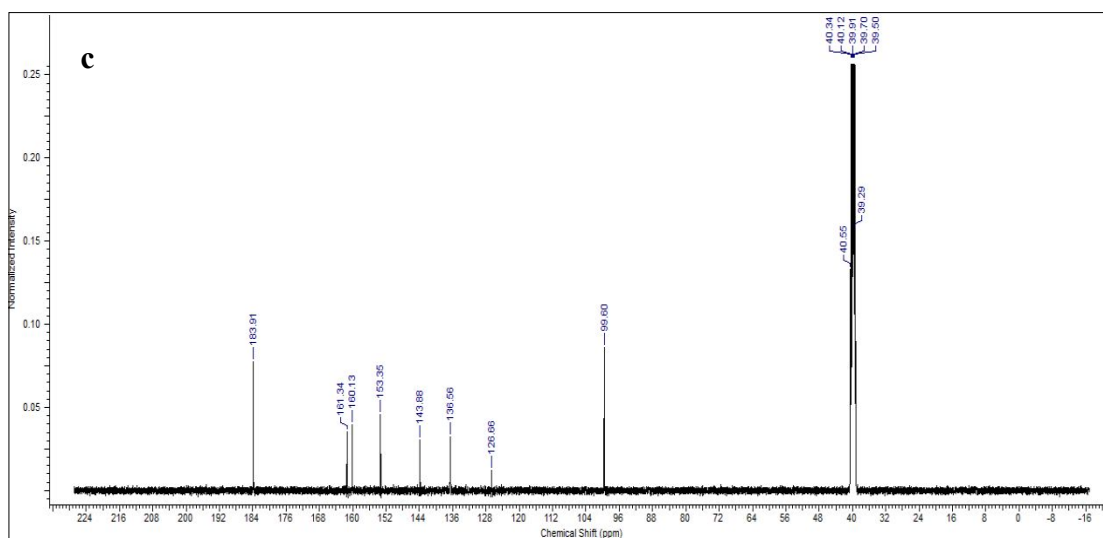

**Fig S8.** (a) IR spectrum; (b) <sup>1</sup>H-NMR spectrum; (c) <sup>13</sup>C-NMR spectrum for compound **23**

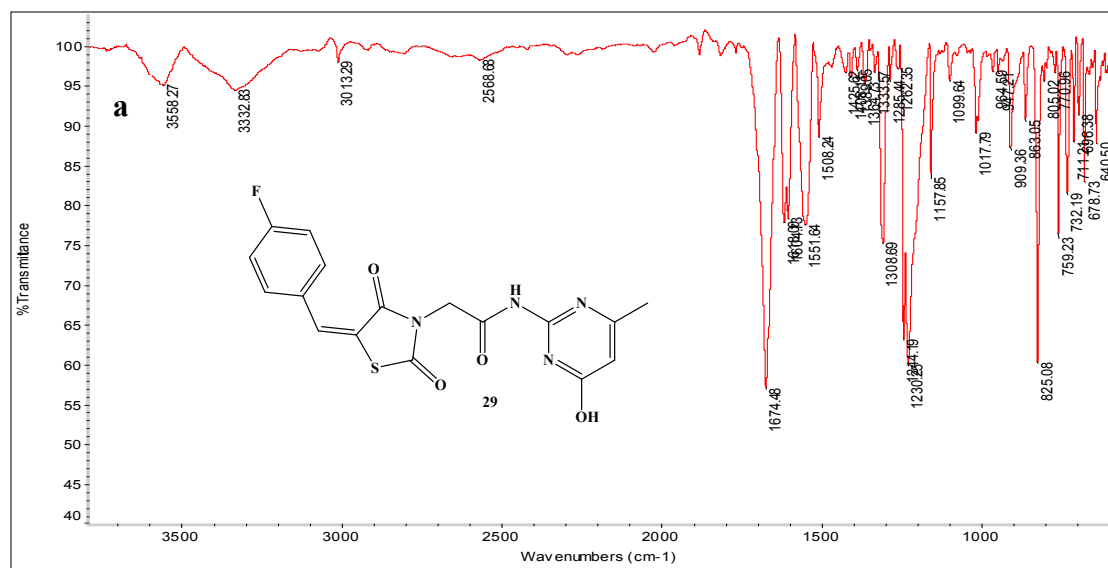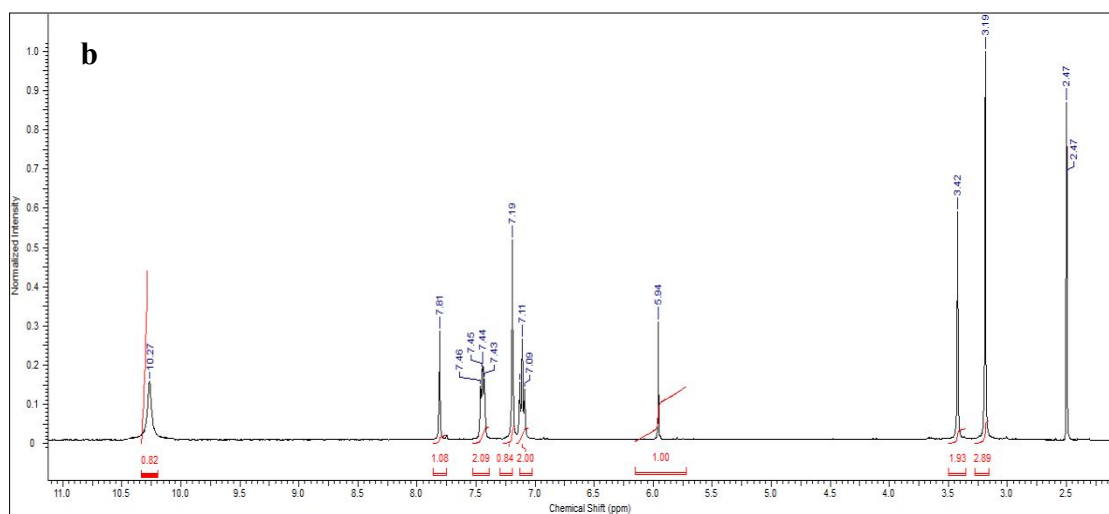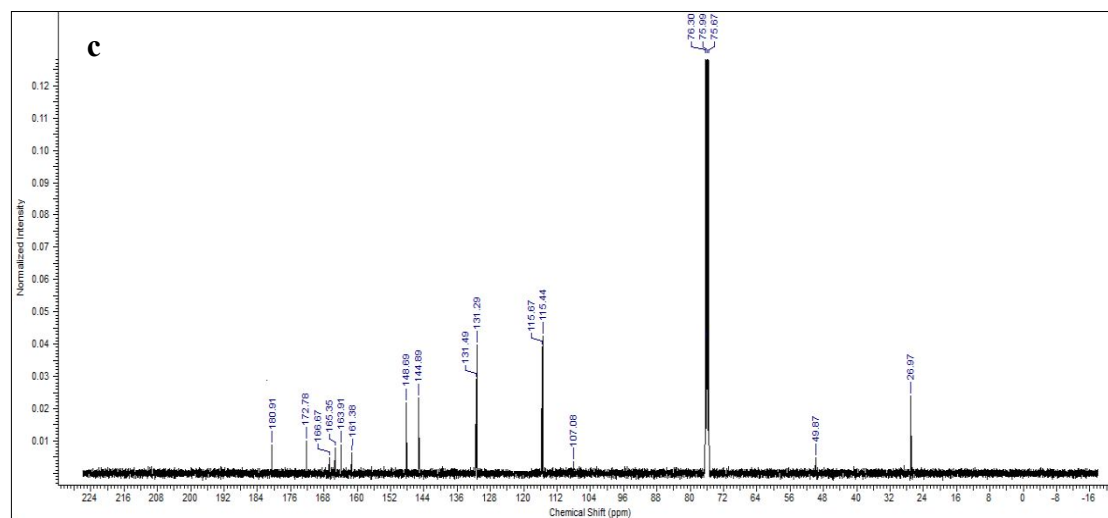

**Fig S9.** (a) IR spectrum; (b) <sup>1</sup>H-NMR spectrum; (c) <sup>13</sup>C-NMR spectrum for compound **29**

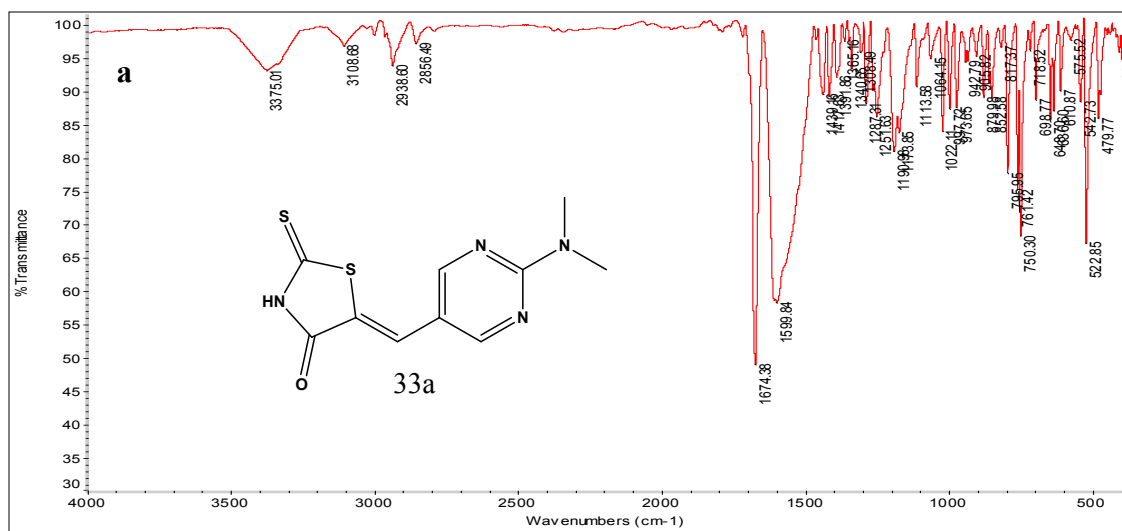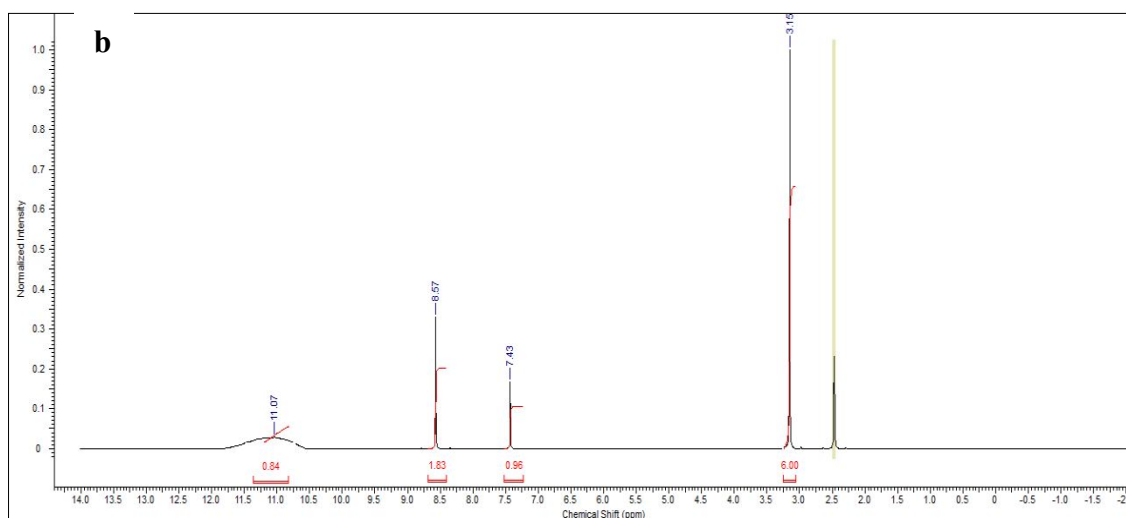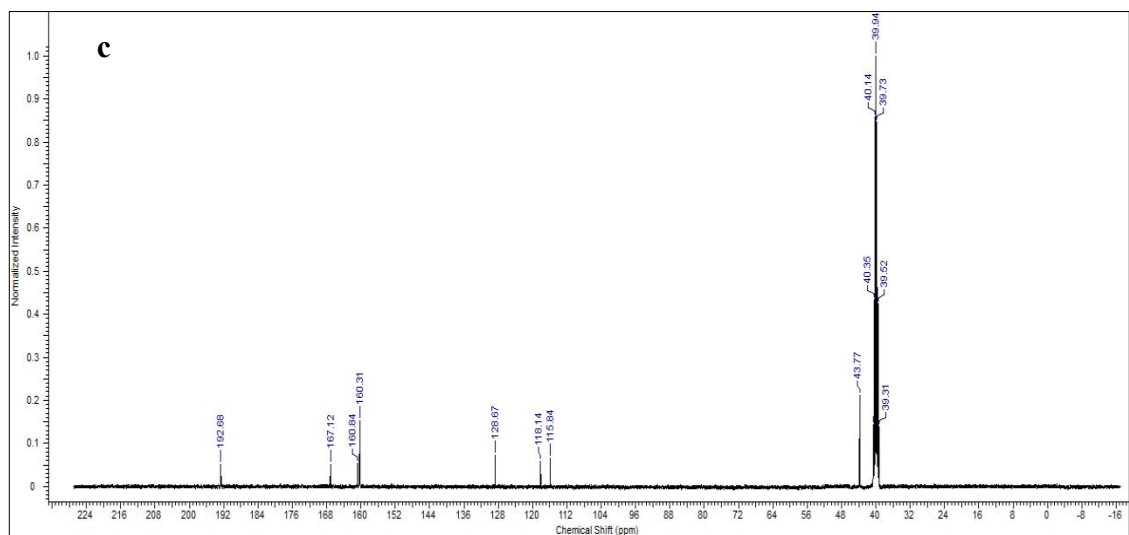

Fig S10. (a) IR spectrum; (b) <sup>1</sup>H-NMR spectrum; (c) <sup>13</sup>C-NMR spectrum for compound 33a

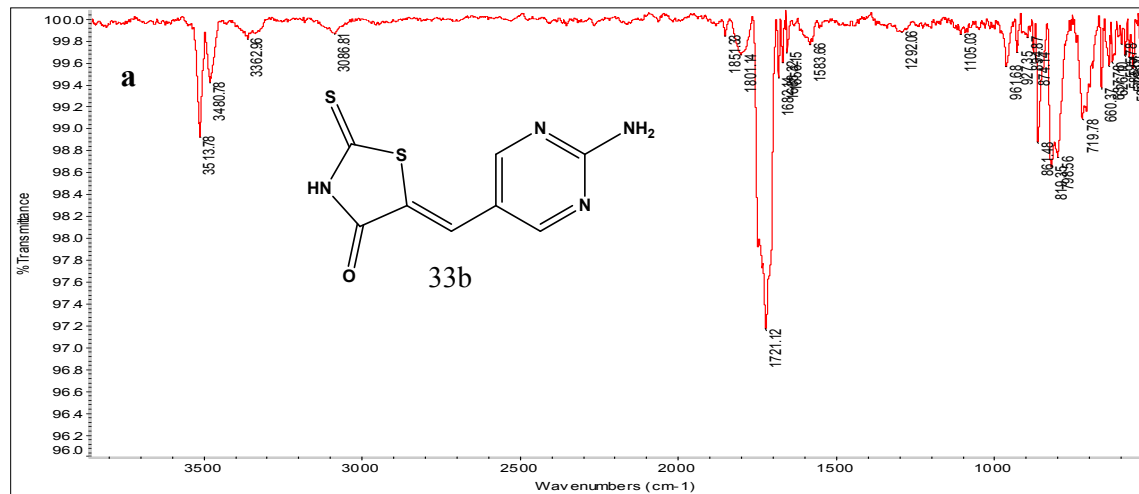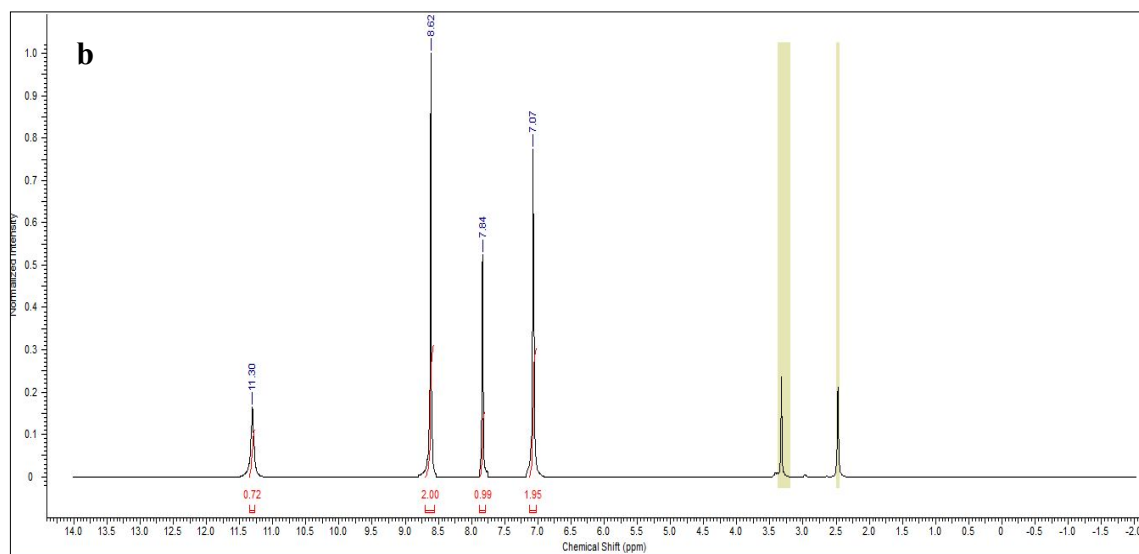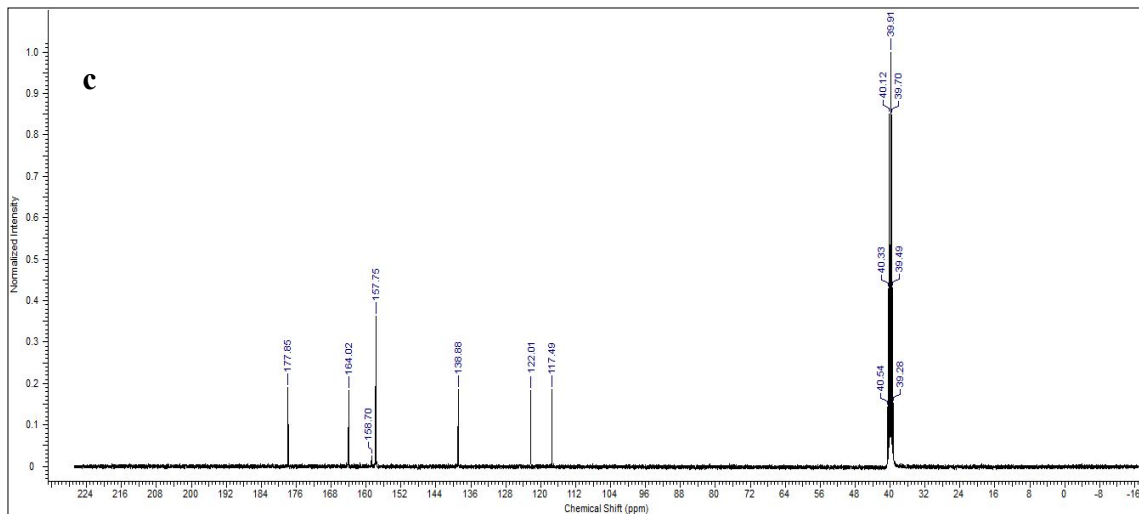

Fig S11. (a) IR spectrum; (b) <sup>1</sup>H-NMR spectrum; (c) <sup>13</sup>C-NMR spectrum for compound 33b

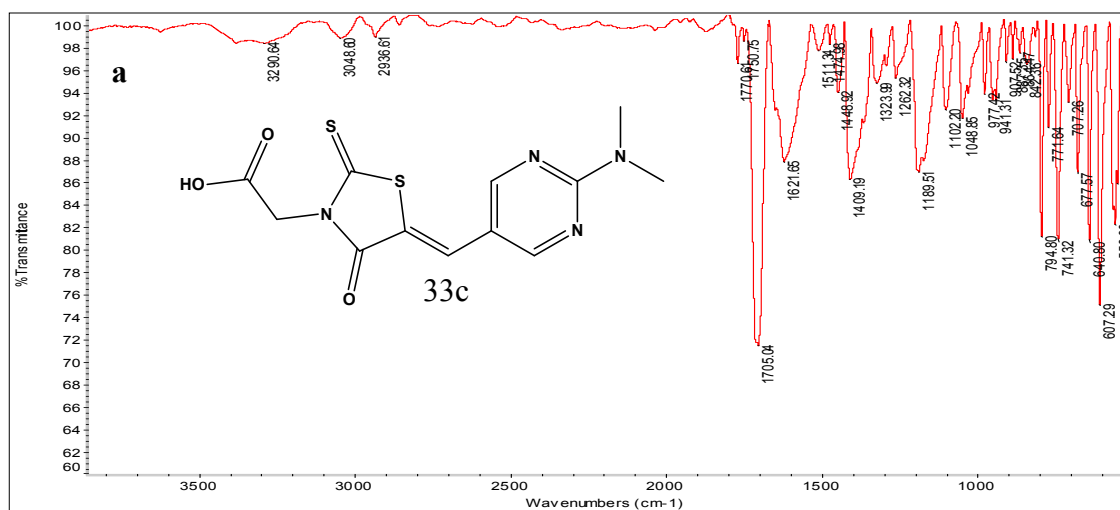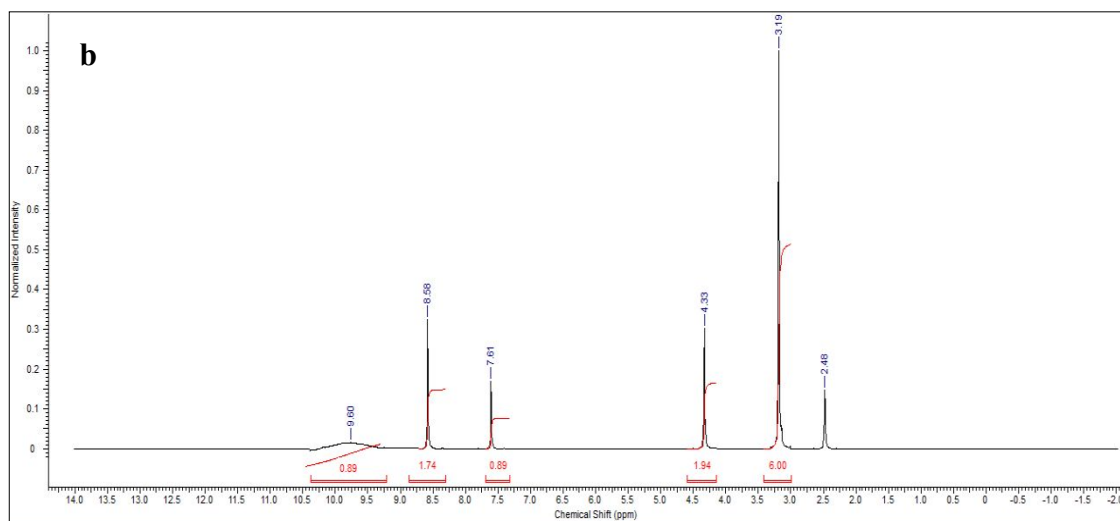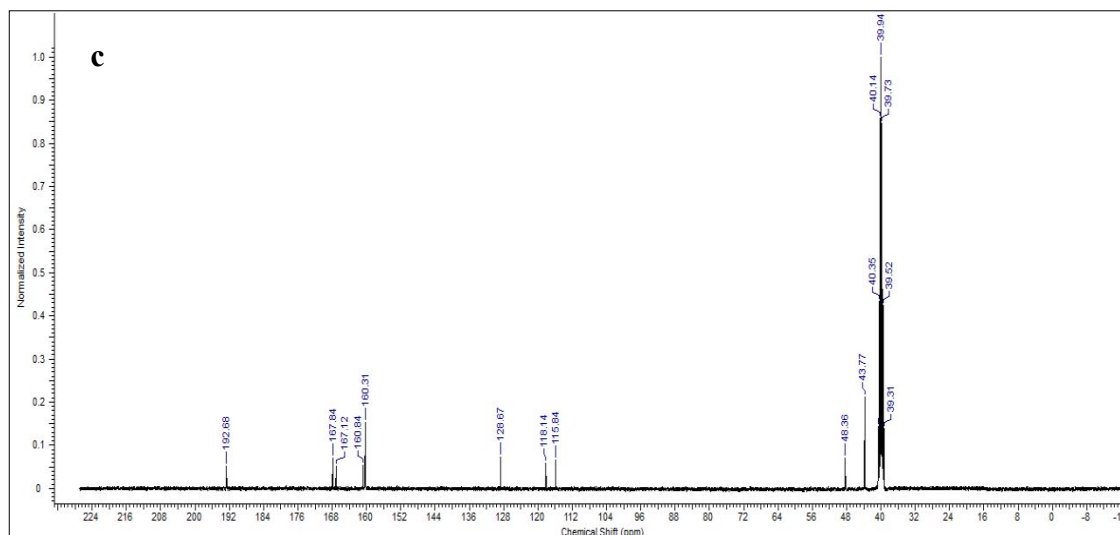

Fig S12. (a) IR spectrum; (b) <sup>1</sup>H-NMR spectrum; (c) <sup>13</sup>C-NMR spectrum for compound 33c

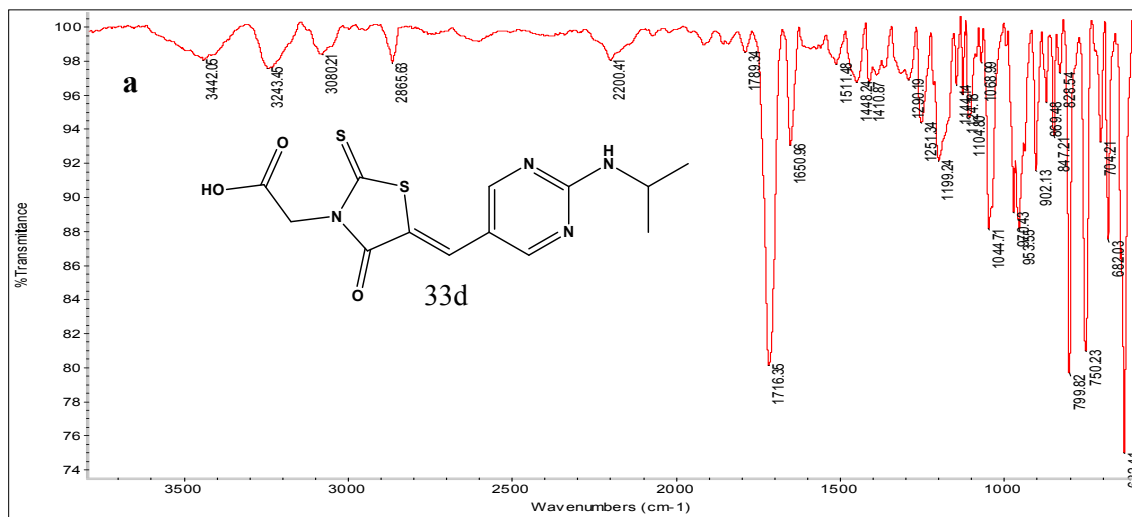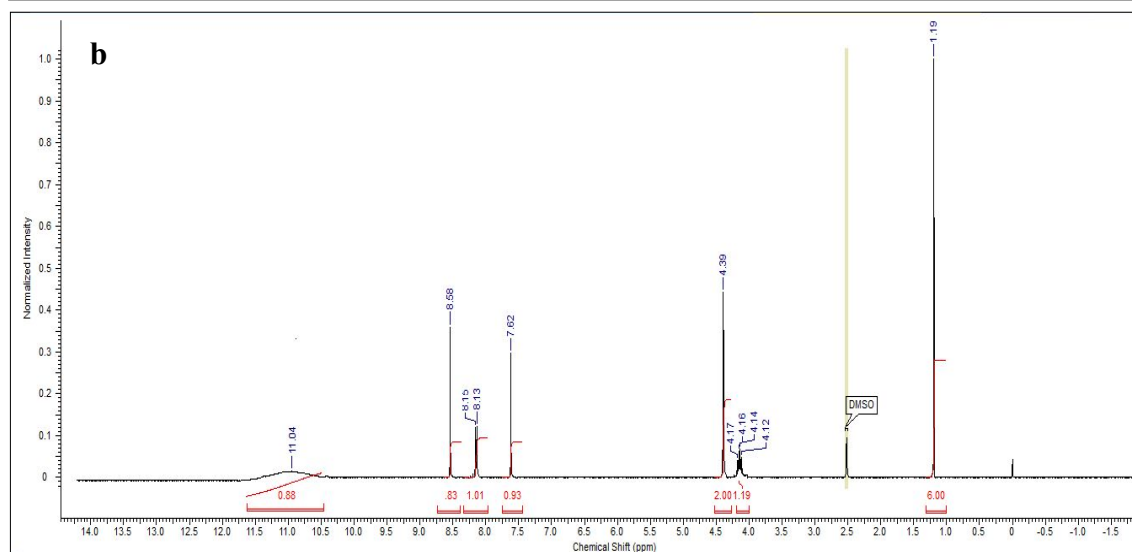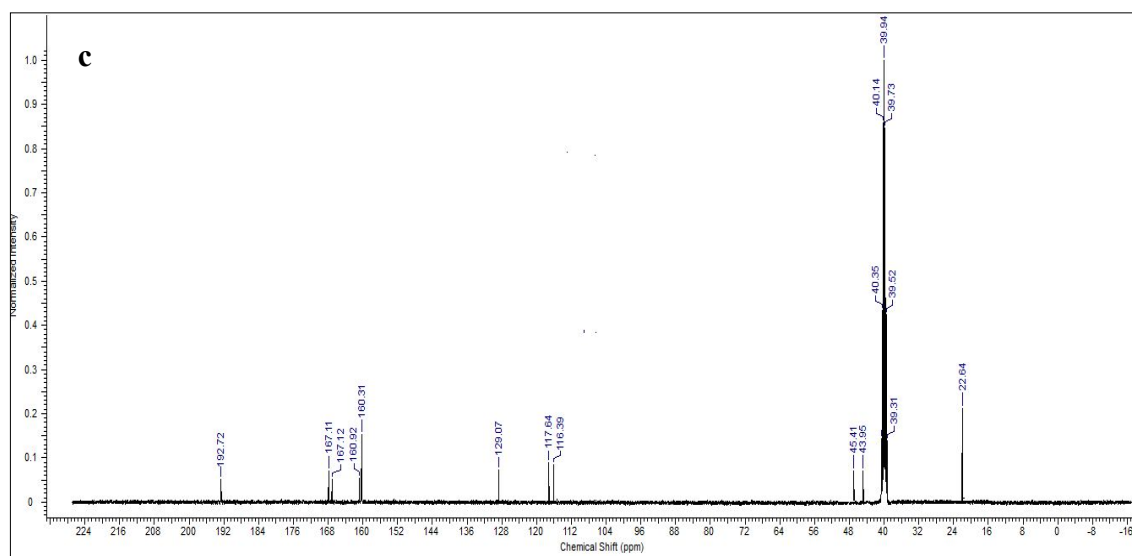

Fig S13. (a) IR spectrum; (b) <sup>1</sup>H-NMR spectrum; (c) <sup>13</sup>C-NMR spectrum for compound 33d

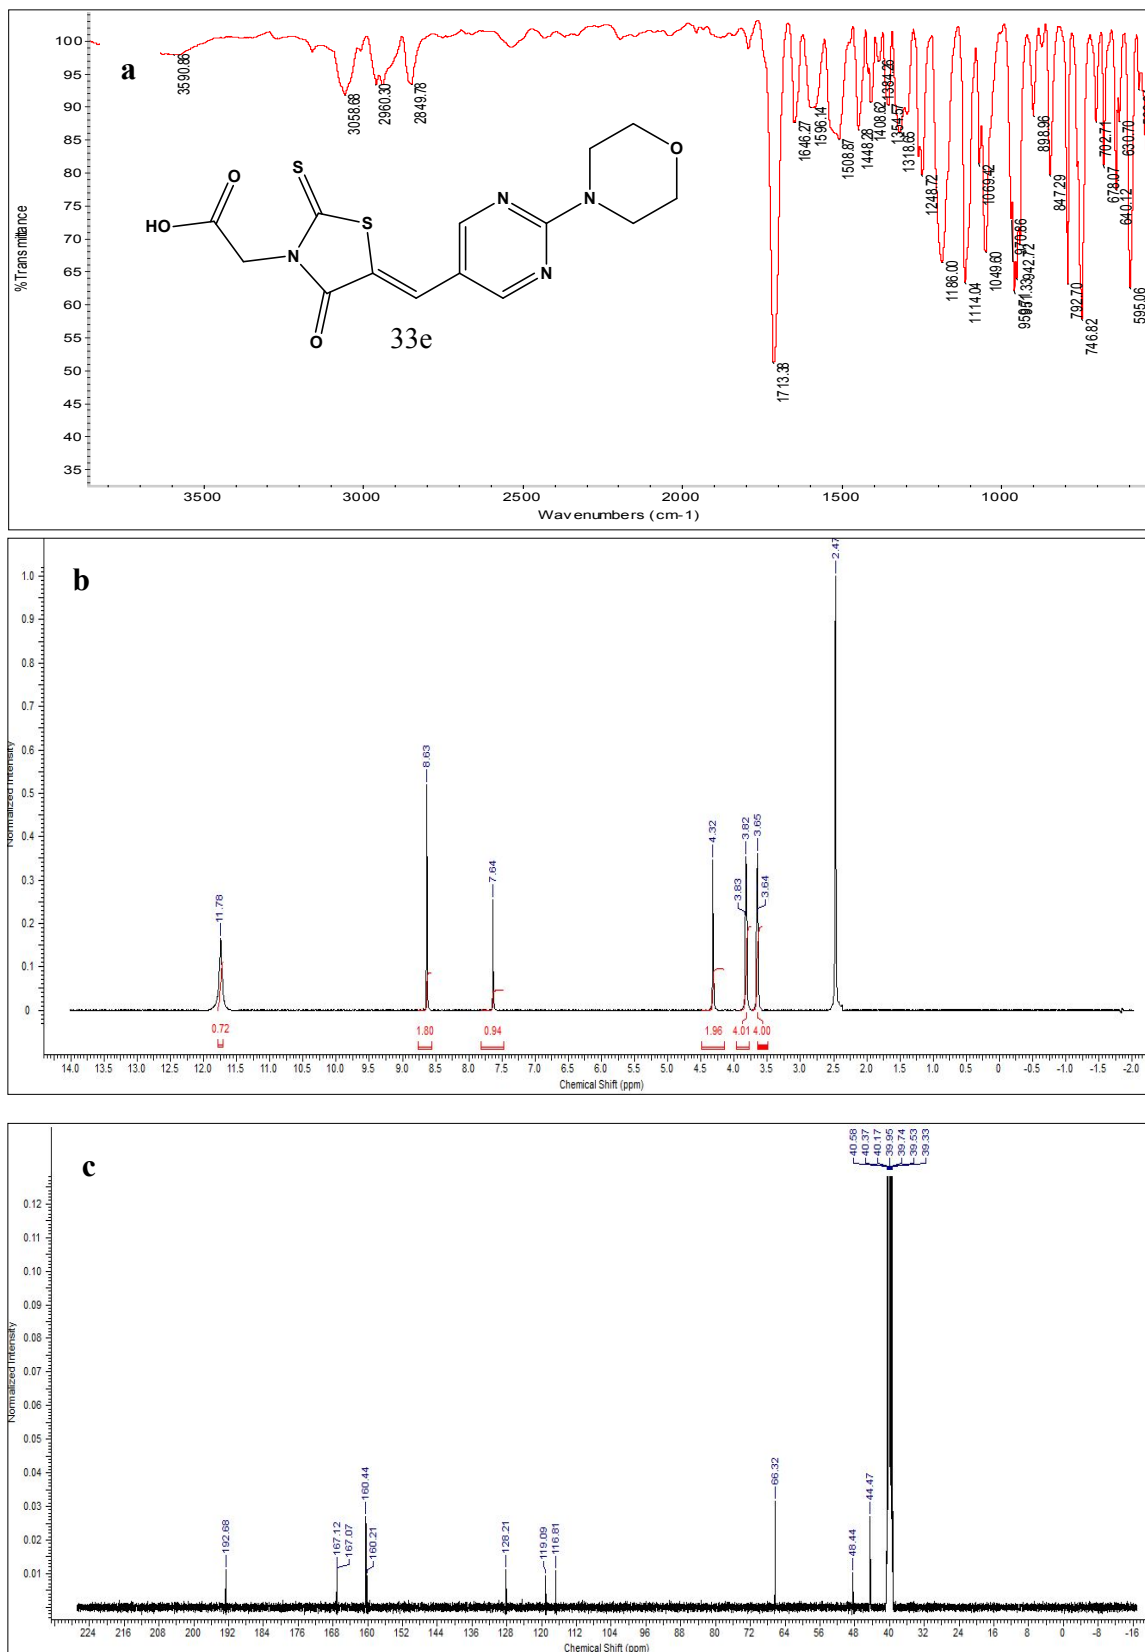

Fig S14. (a) IR spectrum; (b)  $^1\text{H}$ -NMR spectrum; (c)  $^{13}\text{C}$ -NMR spectrum for compound 33e



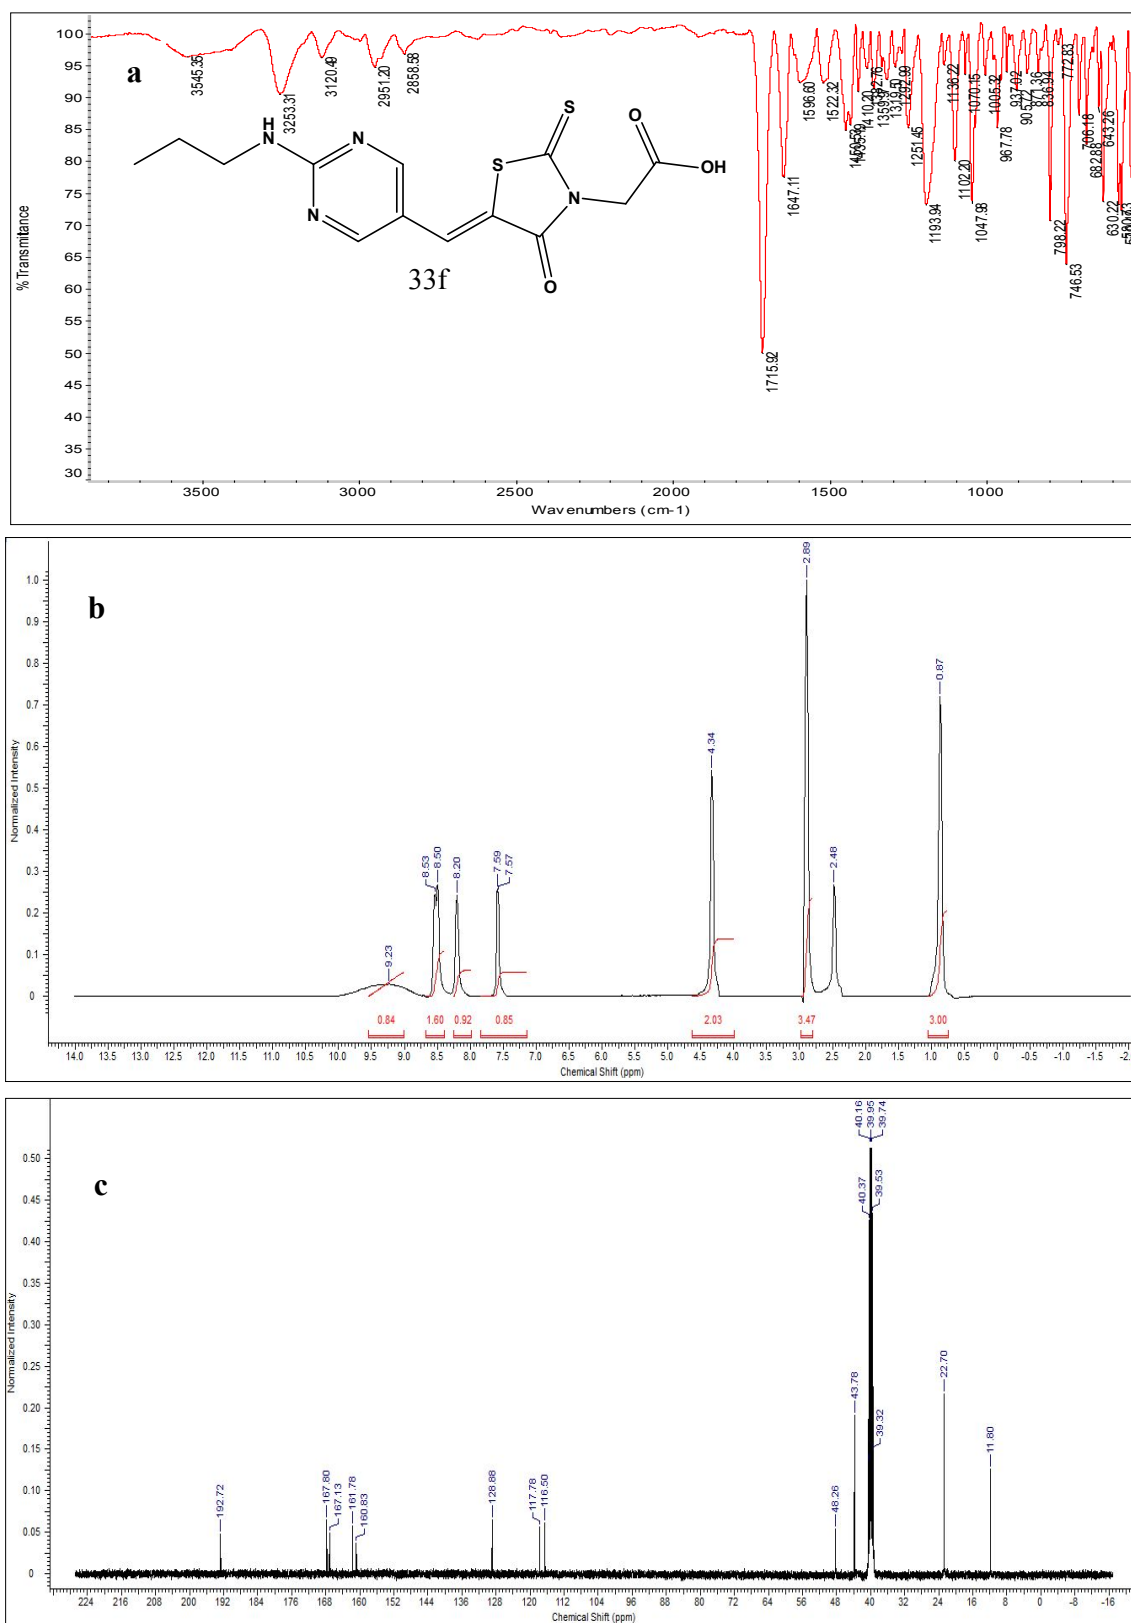

Fig S15. (a) IR spectrum; (b) <sup>1</sup>H-NMR spectrum; (c) <sup>13</sup>C-NMR spectrum for compound 33f



Table S1. Docking scores of different ligands into PDB:1WM0, PDB:1ZGY and PDB:117I PPAR- $\gamma$  crystal structures.

|    | Ligand ID | Compound structure                                                                  | XP docking score (kcal/mol) |        |        |
|----|-----------|-------------------------------------------------------------------------------------|-----------------------------|--------|--------|
|    |           |                                                                                     | 1WM0                        | 1ZGY   | 117I   |
| 1  | 1ZGY_S    | 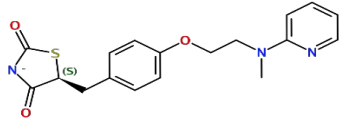   | -9.081                      | -8.628 | -8.258 |
| 2  | 1ZGY_R    |    | -2.582                      | -7.884 | -7.999 |
| 3  | MF1       |    | -8.232                      | -8.856 | -7.219 |
| 4  | MF1_E     |    | -7.355                      | -6.572 | -8.323 |
| 5  | MF10      |   | -7.577                      | -6.181 | -9.698 |
| 6  | MF10_Z    |  | -8.787                      | -7.708 | -7.823 |
| 7  | MF11      |  | -8.521                      | -6.068 | -7.115 |
| 8  | MF11_Z    |  | -9.604                      | -4.94  | -6.766 |
| 9  | MF12      |  | -7.029                      | -4.729 | -5.643 |
| 10 | MF12_Z    |  | -6.337                      | -4.285 | -5.43  |

|    |        |                                                                                     |        |        |        |
|----|--------|-------------------------------------------------------------------------------------|--------|--------|--------|
| 11 | MF13   | 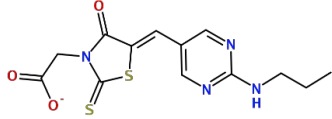   | -7.093 | -5.186 | -6.02  |
| 12 | MF13_Z |    | -7.073 | -4.461 | -5.256 |
| 13 | MF14   |    | -6.885 | -5.041 | -6.284 |
| 14 | MF14_Z |    | -6.433 | -4.794 | -6.269 |
| 15 | MF2    |    | -3.821 | -5.284 | -4.598 |
| 16 | MF2_E  |   | -4.742 | -4.281 | -6.018 |
| 17 | MF3    |  | -8.008 | -6.185 | -6.962 |
| 18 | MF3_E  |  | -7.739 | -6.88  | -6.954 |
| 19 | MF4    |  | -7.349 | -6.914 | -6.559 |
| 20 | MF4_E  |  | -6.978 | -2.001 | -7.455 |
| 21 | MF7_R  |  | -8.816 | -6.794 | -6.592 |

|    |                |                                                                                     |         |        |        |
|----|----------------|-------------------------------------------------------------------------------------|---------|--------|--------|
| 22 | MF7_R          | 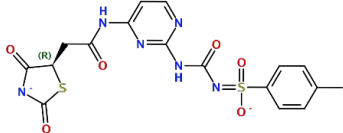   | -6.35   | -5.849 | -5.325 |
| 23 | MF7_S          |    | -8.567  | -8.296 | -6.964 |
| 24 | MF7_S          |    | -6.767  | -5.869 | -6.482 |
| 25 | pioglitazone_R |    | -10.151 | -9.251 | -8.927 |
| 26 | pioglitazone_R |    | -7.668  | -8.304 | -8.661 |
| 27 | pioglitazone_S |   | -10.12  | -9.247 | -9.024 |
| 28 | pioglitazone_S |  | -10.052 | -7.767 | -8.978 |
